# Supplementary material for: Unusual hydrogen bond patterns contributing to supramolecular assembly: conformational study, Hirshfeld surface analysis and density functional calculations of a new steroid derivative
Source: Royal Society of Chemistry journal article supplement (doi:10.1039/c4ce00709c), 2014-01-01
Supplement: c4ce00709c1.pdf [file c4ce00709c1.pdf]

## Supporting Information

for

### **Unusual hydrogen bonds pattern for contribution a supramolecular assembly: Conformational study, Hirshfeld surface analysis and density functional calculations of a new steroid derivative.**

Alberto Ruiz<sup>1</sup>, Hiram Pérez\*<sup>2</sup>, Cercis Morera-Boado<sup>3</sup>, Luis Almagro<sup>1</sup>, Cecilia C. P. da Silva<sup>4</sup>, Javier Ellena<sup>4</sup>, José M. García de la Vega<sup>5</sup>, Roberto Martínez-Álvarez,<sup>6</sup> Margarita Suárez\*<sup>1</sup> and Nazario Martín\*<sup>6</sup>

<sup>1</sup>Laboratorio de Síntesis Orgánica, Facultad de Química, Universidad de la Habana. 10400-La Habana, Cuba

<sup>2</sup>Departamento de Química Inorgánica, Facultad de Química, Universidad de La Habana, 10400-La Habana, Cuba

<sup>3</sup>Laboratorio de Química, Computacional y Teórica. Facultad de Química. Universidad de la Habana. 10400-La Habana, Cuba.

<sup>4</sup>Grupo de Cristalografía, Instituto de Física de São Carlos, Universidade de São Paulo, São Carlos, Brazil.

<sup>5</sup>Departamento de Química Física Aplicada. Facultad de Ciencias, Universidad Autónoma de Madrid. Spain

<sup>6</sup>Departamento de Química Orgánica I, Facultad de Ciencias Químicas, Universidad Complutense de Madrid, 28040 Madrid, Spain.

Email:

Hiram Pérez\* -hperez@fq.uh.cu; Margarita Suárez\*-msuarez@fq.uh.cu;

Nazario Martín\* -nazmar@quim.ucm.es

\*Corresponding authors

Table of Contents

|                                                                                                                                                                                        |     |
|----------------------------------------------------------------------------------------------------------------------------------------------------------------------------------------|-----|
| <b>Table S1.</b> The ring puckering parameters of compound <b>I</b> .                                                                                                                  | S2  |
| <b>Table S2.</b> Experimental X-ray and theoretical bond lengths (Å) of compound <b>I</b> .                                                                                            | S3  |
| <b>Table S3.</b> Experimental X-ray and theoretical angles (°) of compound <b>I</b> .                                                                                                  | S4  |
| <b>Table S4.</b> Experimental X-ray and theoretical torsion angles (°) of compound <b>I</b>                                                                                            | S6  |
| <b>Figure S1.</b> Mean deviations values of bond lengths, bond angles and torsion angle                                                                                                | S8  |
| <b>Table S5.</b> Relationship of C17-C16-C18-H torsion angle with C18-H distance<br>( $\nu_{\text{C18-H}}$ ) and stretching vibrational frequencies of C18-H ( $\nu_{\text{C18-H}}$ ). | S9  |
| <b>Table S6.</b> Relative contributions to the Hirshfeld surface area for the<br>intermolecular contacts of the three molecules in title compound.                                     | S9  |
| <b>Cif CCDC 925060</b>                                                                                                                                                                 | S10 |

**Table S1.** The ring puckering parameters of compound **I**.

| Molecule | Ring     | Q(2) (Å)  | Q(3) (Å)   | $\Phi$ (2) (°) | Q (Å)     | $\theta$ (°) |
|----------|----------|-----------|------------|----------------|-----------|--------------|
| IA       | <i>A</i> | 0.023 (3) | -0.568 (3) | 63.3 (7)       | 0.568 (3) | 179.7 (3)    |
|          | <i>B</i> | 0.016 (3) | -0.563 (3) | 107.8 (1)      | 0.562 (3) | 180.0 (3)    |
|          | <i>C</i> | 0.111 (3) | -0.578 (3) | 99.0 (1)       | 0.589 (3) | 169.0 (3)    |
|          | <i>D</i> | 0.364 (3) |            | 34.2 (5)       |           |              |
| IB       | <i>A</i> | 0.040 (3) | -0.563 (3) | 119.0 (4)      | 0.565 (3) | 176.0 (3)    |
|          | <i>B</i> | 0.049 (3) | -0.588 (3) | 92.8 (3)       | 0.588 (3) | 175.4 (3)    |
|          | <i>C</i> | 0.128 (3) | -0.561 (3) | 84.7 (1)       | 0.576 (3) | 167.1 (3)    |
|          | <i>D</i> | 0.375 (3) |            | 31.1 (5)       |           |              |
| IC       | <i>A</i> | 0.051 (3) | -0.563 (3) | 91.1 (4)       | 0.565 (3) | 174.8 (3)    |
|          | <i>B</i> | 0.007 (3) | -0.567 (3) | 155.0 (2)      | 0.567 (3) | 180.0 (3)    |
|          | <i>C</i> | 0.101 (3) | -0.579 (3) | 97.0 (2)       | 0.587 (3) | 170.1 (3)    |
|          | <i>D</i> | 0.371 (3) |            | 30.9 (5)       |           |              |

**Table S2.** Experimental X-ray and theoretical bond lengths (Å) of compound **I**.

| Parameters*                           | Experimental   |                |                | Calculated                           |                                       |
|---------------------------------------|----------------|----------------|----------------|--------------------------------------|---------------------------------------|
|                                       | Molecule<br>IA | Molecule<br>IB | Molecule<br>IC | <sup>a</sup> M06-2X/<br>6-31++G(d,p) | <sup>b</sup> M06-2X/<br>6-311++G(d,p) |
| C1-C17                                | 1.721(3)       | 1.720(3)       | 1.715(4)       | 1,729                                | 1,729                                 |
| O1-C21                                | 1.334(4)       | 1.342(3)       | 1.340(4)       | 1,346                                | 1,344                                 |
| O1-C3                                 | 1.460 (3)      | 1.463(3)       | 1.459(3)       | 1,441                                | 1,441                                 |
| O2-C21                                | 1.208(4)       | 1.201(3)       | 1.202(5)       | 1,208                                | 1,202                                 |
| O3-C18                                | 1.204(5)       | 1.202(4)       | 1.210(6)       | 1,214                                | 1,207                                 |
| C1-C2                                 | 1.527(4)       | 1.526(3)       | 1.532(4)       | 1,533                                | 1,533                                 |
| C1-C10                                | 1.542(4)       | 1.536(4)       | 1.537(4)       | 1,544                                | 1,543                                 |
| C2-C3                                 | 1.516(5)       | 1.510(4)       | 1.504(5)       | 1,522                                | 1,521                                 |
| C3-C4                                 | 1.513(4)       | 1.506(4)       | 1.508(4)       | 1,519                                | 1,517                                 |
| C4-C5                                 | 1.525(3)       | 1.537(3)       | 1.531(4)       | 1,531                                | 1,530                                 |
| C5-C6                                 | 1.502(4)       | 1.519(4)       | 1.507(4)       | 1,529                                | 1,528                                 |
| C5-C10                                | 1.549(4)       | 1.545(4)       | 1.548(4)       | 1,556                                | 1,555                                 |
| C6-C7                                 | 1.519(3)       | 1.531(4)       | 1.515(4)       | 1,528                                | 1,527                                 |
| C7-C8                                 | 1.523(4)       | 1.525(4)       | 1.517(4)       | 1,531                                | 1,530                                 |
| C8-C14                                | 1.515(3)       | 1.510(3)       | 1.517(3)       | 1,520                                | 1,519                                 |
| C8-C9                                 | 1.552(3)       | 1.545(4)       | 1.548(3)       | 1,552                                | 1,552                                 |
| C9-C11                                | 1.544(4)       | 1.535(4)       | 1.544(4)       | 1,545                                | 1,544                                 |
| C9-C10                                | 1.553(3)       | 1.556(3)       | 1.554(3)       | 1,557                                | 1,556                                 |
| C10-C20                               | 1.537(4)       | 1.536(4)       | 1.537(4)       | 1,539                                | 1,538                                 |
| C11-C12                               | 1.535(3)       | 1.540(3)       | 1.531(3)       | 1,541                                | 1,540                                 |
| C12-C13                               | 1.524(4)       | 1.517(4)       | 1.518(4)       | 1,527                                | 1,526                                 |
| C13-C17                               | 1.507(3)       | 1.512(3)       | 1.513(4)       | 1,513                                | 1,511                                 |
| C13-C19                               | 1.540(4)       | 1.546(4)       | 1.542(4)       | 1,544                                | 1,543                                 |
| C13-C14                               | 1.549(4)       | 1.537(4)       | 1.544(4)       | 1,546                                | 1,545                                 |
| C14-C15                               | 1.534(3)       | 1.541(4)       | 1.534(4)       | 1,537                                | 1,536                                 |
| C15-C16                               | 1.509(4)       | 1.507(4)       | 1.505(5)       | 1,518                                | 1,517                                 |
| C16-C17                               | 1.347(4)       | 1.326(4)       | 1.344(5)       | 1,346                                | 1,342                                 |
| C16-C18                               | 1.460(4)       | 1.467(4)       | 1.462(4)       | 1,468                                | 1,467                                 |
| C18-H                                 | 1.030(4)       | 1.050(3)       | 1.040(6)       | 1,106                                | 1,104                                 |
| C21-C22                               | 1.501(4)       | 1.493(4)       | 1.499(4)       | 1,505                                | 1,504                                 |
| $MD = \sum  x_{exp} - x^a_{theor} /N$ | <b>0.009</b>   | <b>0.010</b>   | <b>0.009</b>   |                                      |                                       |
| $MD = \sum  x_{exp} - x^b_{theor} /N$ | <b>0.008</b>   | <b>0.008</b>   | <b>0.008</b>   |                                      |                                       |

\* The structure parameters are in accordance with the atom numbering scheme given in Figure  
In *MD* (mean deviation) expression:  $x$  = bond lengths and  $N= 30$ .  
<sup>a</sup>M06-2X/6-31++G(d,p)  
<sup>b</sup>M06-2X/6-311++G(d,p)

**Table S3.** Experimental X-ray and theoretical angles (°) of compound **I**.

| Parameters* | Experimental   |                |                | Calculated                           |                                       |
|-------------|----------------|----------------|----------------|--------------------------------------|---------------------------------------|
|             | Molecule<br>IA | Molecule<br>IB | Molecule<br>IC | <sup>a</sup> M06-2X/<br>6-31++G(d,p) | <sup>b</sup> M06-2X/<br>6-311++G(d,p) |
| C21-O1-C3   | 117.5(3)       | 117.1(2)       | 117.7(3)       | 117,0                                | 117,1                                 |
| C2-C-C10    | 114.0(2)       | 113.7(2)       | 113.7(2)       | 113,6                                | 113,6                                 |
| C3-C2-C1    | 110.9(3)       | 110.7(2)       | 111.8(3)       | 110,8                                | 110,8                                 |
| O1-C3-C4    | 111.2(2)       | 106.6(2)       | 110.7(2)       | 107,1                                | 107,1                                 |
| O1-C3-C2    | 106.3(3)       | 109.8(2)       | 106.0(3)       | 110,6                                | 110,6                                 |
| C4-C3-C2    | 111.9(3)       | 112.9(2)       | 112.8(3)       | 111,5                                | 111,6                                 |
| C3-C4-C5    | 110.4(2)       | 111.1(2)       | 110.5(2)       | 110,3                                | 110,2                                 |
| C6-C5-C4    | 113.0(2)       | 111.8(2)       | 112.4(2)       | 112,1                                | 112,1                                 |
| C6-C5-C10   | 113.6(2)       | 112.2(2)       | 113.1(2)       | 112,3                                | 112,3                                 |
| C4-C5-C10   | 113.2(2)       | 112.9(2)       | 113.0(2)       | 113,0                                | 113,0                                 |
| C5-C6-C7    | 111.9(2)       | 111.6(3)       | 111.8(2)       | 112,1                                | 110,8                                 |
| C6-C7-C8    | 111.5(2)       | 111.9(2)       | 111.0(2)       | 112,1                                | 112,0                                 |
| C14-C8-C7   | 112.5(2)       | 112.3(2)       | 112.3(2)       | 111,8                                | 111,7                                 |
| C14-C8-C9   | 107.5(2)       | 108.6(2)       | 107.9(2)       | 107,4                                | 107,3                                 |
| C7-C8-C9    | 111.3(2)       | 110.0(2)       | 111.5(2)       | 110,0                                | 111,0                                 |
| C11-C9-C8   | 112.3(2)       | 113.6(2)       | 111.9(2)       | 113,0                                | 113,0                                 |
| C11-C9-C10  | 113.8(2)       | 114.0(2)       | 114.0(2)       | 113,7                                | 113,7                                 |
| C8-C9-C10   | 112.4(2)       | 111.3(2)       | 112.4(2)       | 112,1                                | 112,0                                 |
| C20-C10-C1  | 109.5(2)       | 109.2(2)       | 109.6(2)       | 109,1                                | 109,1                                 |
| C20-C10-C5  | 111.7(2)       | 112.1(2)       | 112.0(2)       | 111,8                                | 111,9                                 |
| C1-C10-C5   | 106.8(2)       | 106.6(2)       | 106.2(2)       | 107,6                                | 107,6                                 |
| C20-C10-C9  | 110.7(2)       | 110.8(2)       | 110.5(2)       | 111,0                                | 111,0                                 |
| C1-C10-C9   | 110.1(2)       | 110.7(2)       | 110.3(2)       | 110,2                                | 110,1                                 |
| C5-C10-C9   | 107.9(2)       | 107.4(2)       | 108.0(2)       | 107,1                                | 107,1                                 |
| C12-C11-C9  | 115.1(2)       | 114.9(2)       | 115.1(2)       | 114,5                                | 114,4                                 |
| C13-C12-C11 | 109.9(2)       | 109.7(2)       | 109.7(2)       | 109,8                                | 109,8                                 |
| C17-C13-C12 | 118.2(2)       | 118.7(2)       | 118.6(2)       | 118,7                                | 118,6                                 |
| C17-C13-C19 | 106.4(2)       | 106.2(2)       | 106.2(2)       | 106,2                                | 106,2                                 |
| C12-C13-C19 | 111.5(2)       | 111.7(3)       | 111.1(2)       | 110,8                                | 111,0                                 |
| C17-C13-C14 | 98.7(2)        | 98.5(2)        | 98.6(2)        | 98,8                                 | 98,7                                  |
| C12-C13-C14 | 107.5(2)       | 107.6(2)       | 107.8(2)       | 108,2                                | 108,2                                 |
| C19-C13-C14 | 114.2(2)       | 113.6(3)       | 114.3(3)       | 113,8                                | 113,8                                 |
| C8-C14-C15  | 123.2(2)       | 122.0(2)       | 122.6(2)       | 122,2                                | 122,3                                 |
| C8-C14-C13  | 112.2(2)       | 112.4(2)       | 112.2(2)       | 112,2                                | 112,1                                 |
| C15-C14-C13 | 104.7(2)       | 104.0(2)       | 104.4(2)       | 104,5                                | 104,5                                 |
| C16-C15-C14 | 100.9(2)       | 100.8(2)       | 100.8(3)       | 100,8                                | 100,8                                 |
| C17-C16-C18 | 125.2(3)       | 126.2(3)       | 125.0(4)       | 126,5                                | 126,5                                 |
| C17-C16-C15 | 109.7(2)       | 110.0(2)       | 110.3(3)       | 109,9                                | 109,9                                 |
| C18-C16-C15 | 125.1(3)       | 123.8(2)       | 124.7(4)       | 126,6                                | 123,6                                 |
| O3-C18-C16  | 124.8(4)       | 124.6(2)       | 123.5(5)       | 122,6                                | 122,7                                 |
| O3-C18-H    | 121.0(2)       | 121.8(18)      | 124.0(3)       | 121,0                                | 121,1                                 |
| C16-C18-H   | 114.0(2)       | 113.7(18)      | 112.0(3)       | 116,4                                | 116,2                                 |
| C16-C17-C13 | 112.9(2)       | 112.6(2)       | 111.9(3)       | 112,2                                | 112,3                                 |
| C16-C17-C1  | 126.3(2)       | 126.9(2)       | 126.4(2)       | 126,6                                | 126,6                                 |
| C13-C17-C1  | 120.6(2)       | 120.1(2)       | 121.3(3)       | 120,9                                | 120,8                                 |
| O2-C21-O1   | 123.7(3)       | 122.8(2)       | 123.9(3)       | 123,6                                | 123,7                                 |
| O2-C21-C22  | 125.4(4)       | 124.9(3)       | 124.9(4)       | 125,2                                | 125,3                                 |
| O1-C21-C22  | 110.9(4)       | 112.3(3)       | 111.2(4)       | 111,2                                | 111,0                                 |

$$MD = \sum |x_{exp} - x_{theor}^a|/N$$

**0.69****0.55****0.79**

$$MD = \sum |x_{exp} - x_{theor}^b|/N \quad \mathbf{0.66} \quad \mathbf{0.52} \quad \mathbf{0.77}$$

---

\* The structure parameters are in accordance with the atom numbering scheme given in Figure

In *MD* (mean deviation) expression:  $x$  = angles and  $N= 48$ .

<sup>a</sup>M06-2X/6-31++G(d,p)

<sup>b</sup>M06-2X/6-311++G(d,p)

---

**Table S4.** Experimental X-ray and theoretical torsion angles (°) of compound **I**

| Parameters*     | Experimental   |                |                | Calculated                           |                                       |
|-----------------|----------------|----------------|----------------|--------------------------------------|---------------------------------------|
|                 | Molecule<br>IA | Molecule<br>IB | Molecule<br>IC | <sup>a</sup> M06-2X/<br>6-31++G(d,p) | <sup>b</sup> M06-2X/<br>6-311++G(d,p) |
| C10-C1-C2-C3    | 55.1(4)        | 56.2(3)        | 54.4(4)        | 55.4                                 | 55.1                                  |
| C21-O1-C3-C4    | 81.9(3)        | 160.1(2)       | 77.3(3)        | 157.5                                | 157.2                                 |
| C21-O1-C3-C2    | -156.1(3)      | -77.3(3)       | -160(3)        | -80.8                                | -80.9                                 |
| C1-C2-C3-O1     | -175.7(2)      | -171.6(2)      | -173(2)        | -174.5                               | -174.7                                |
| C1-C2-C3-C4     | -54.2(4)       | -52.8(3)       | -51.8(4)       | -55.4                                | -55.5                                 |
| O1-C3-C4-C5     | 174.3(2)       | 173.7(2)       | 172(2)         | 177.7                                | 177.9                                 |
| C2-C3-C4-C5     | 55.7(3)        | 53(3)          | 53.4(4)        | 56.5                                 | 56.7                                  |
| C3-C4-C5-C6     | 171.1(3)       | 176.6(3)       | 172.7(3)       | 174.2                                | 174.3                                 |
| C3-C4-C5-C10    | -58.0(3)       | -55.9(3)       | -57.8(3)       | -57.6                                | -57.6                                 |
| C4-C5-C6-C7     | -172.8(2)      | -175.9(3)      | -173.2(3)      | -173.3                               | -173.3                                |
| C10-C5-C6-C7    | 56.5(3)        | 56.1(4)        | 57.3(3)        | 63.4                                 | 58.3                                  |
| C5-C6-C7-C8     | -54.5(3)       | -53.8(4)       | -55.9(4)       | -54.5                                | -54.6                                 |
| C6-C7-C8-C14    | 174.5(2)       | 175.7(3)       | 176(2)         | 173.3                                | 173.3                                 |
| C6-C7-C8-C9     | 53.8(3)        | 54.6(4)        | 54.7(3)        | 53.4                                 | 53.6                                  |
| C14-C8-C9-C11   | 51.3(3)        | 47.9(3)        | 51.3(3)        | 51.6                                 | 51.7                                  |
| C7-C8-C9-C11    | 174.9(2)       | 171.2(2)       | 175.1(2)       | 174.3                                | 174.3                                 |
| C14-C8-C9-C10   | -178.8(2)      | -178.2(2)      | -179(2)        | -178.4                               | -178.3                                |
| C7-C8-C9-C10    | -55.2(3)       | -58.5(3)       | -55.2(3)       | -55.9                                | -56.0                                 |
| C2-C1-C10-C20   | 66.8(3)        | 64.6(3)        | 65.7(4)        | 67.6                                 | 67.6                                  |
| C2-C1-C10-C5    | -54.4(3)       | -56.7(3)       | -55.5(3)       | -53.9                                | -54.0                                 |
| C2-C1-C10-C9    | -171.3(3)      | -173.2(2)      | -172.3(3)      | -170.3                               | -170.4                                |
| C6-C5-C10-C20   | 66.7(3)        | 64(3)          | 67(3)          | 63.4                                 | 63.3                                  |
| C4-C5-C10-C20   | -64(3)         | -63.3(3)       | -62.2(3)       | -64.7                                | -64.7                                 |
| C6-C5-C10-C1    | -173.6(2)      | -176.5(3)      | -173.4(2)      | -176.9                               | -176.9                                |
| C4-C5-C10-C1    | 55.8(3)        | 56.1(3)        | 57.5(3)        | 55.0                                 | 55.1                                  |
| C6-C5-C10-C9    | -55.2(3)       | -57.9(3)       | -55(3)         | -58.5                                | -58.6                                 |
| C4-C5-C10-C9    | 174.1(19)      | 174.8(2)       | 175.9(2)       | 173.4                                | 173.4                                 |
| C11-C9-C10-C20  | 60.7(3)        | 66.5(3)        | 59.3(3)        | 64.4                                 | 64.3                                  |
| C8-C9-C10-C20   | -68.4(3)       | -63.6(3)       | -69.3(3)       | -65.3                                | -65.3                                 |
| C11-C9-C10-C1   | -60.6(3)       | -54.7(3)       | -62.2(3)       | -56.5                                | -56.6                                 |
| C8-C9-C10-C1    | 170.3(2)       | 175.1(2)       | 169.2(2)       | 173.8                                | 173.8                                 |
| C11-C9-C10-C5   | -176.8(3)      | -170.7(2)      | -177.9(2)      | -173.3                               | -173.3                                |
| C8-C9-C10-C5    | 54.1(3)        | 59.1(3)        | 53.5(3)        | 57.1                                 | 57.1                                  |
| C8-C9-C11-C12   | -48.3(3)       | -45.5(4)       | -49.2(3)       | -48.9                                | -48.9                                 |
| C10-C9-C11-C12  | -177.4(2)      | -174.5(2)      | -178(2)        | -178.0                               | -178.0                                |
| C9-C11-C12-C13  | 51.2(3)        | 50.8(3)        | 52.2(3)        | 51.2                                 | 51.2                                  |
| C11-C12-C13-C17 | -167.7(2)      | -169.3(3)      | -168.3(3)      | -168.6                               | -168.5                                |
| C11-C12-C13-C19 | 68.6(3)        | 66.7(3)        | 68.3(3)        | 68.2                                 | 68.2                                  |
| C11-C12-C13-C14 | -57.3(3)       | -58.7(3)       | -57.6(3)       | -57.3                                | -57.3                                 |
| C7-C8-C14-C15   | 48.7(3)        | 54.2(3)        | 50(4)          | 51.6                                 | 51.7                                  |
| C9-C8-C14-C15   | 171.6(2)       | 176.1(2)       | 173.2(3)       | 173.6                                | 173.7                                 |
| C7-C8-C14-C13   | 175.1(2)       | 178.6(2)       | 175.4(2)       | 176.9                                | 176.8                                 |
| C9-C8-C14-C13   | -61.9(3)       | -59.5(3)       | -61.3(3)       | -61.1                                | -61.3                                 |
| C17-C13-C14-C8  | -170.4(19)     | -169.7(2)      | -170.6(2)      | 170.2                                | 170.1                                 |
| C12-C13-C14-C8  | 66.3(3)        | 66.4(3)        | 65.5(3)        | 65.7                                 | 65.8                                  |
| C19-C13-C14-C8  | -58(3)         | -57.8(3)       | -58.5(3)       | -58.0                                | -58.1                                 |
| C17-C13-C14-C15 | -34.4(2)       | -35.9(2)       | -35.7(3)       | -35.7                                | -35.7                                 |
| C12-C13-C14-C15 | -157.8(2)      | -159.7(2)      | -159.6(2)      | -159.8                               | -159.7                                |

|                                       |             |             |             |        |        |
|---------------------------------------|-------------|-------------|-------------|--------|--------|
| C19-C13-C14-C15                       | 78.0(3)     | 76(3)       | 76.4(3)     | 76,5   | 76,4   |
| C8-C14-C15-C16                        | 164.0(2)    | 162.7(2)    | 163.1(3)    | 162,7  | 162,6  |
| C13-C14-C15-C16                       | 34.3(3)     | 34.5(3)     | 34.3(3)     | 34,1   | 34,1   |
| C14-C15-C16-C17                       | -20.7(3)    | -19.3(3)    | -19.2(4)    | -19,0  | -19,0  |
| C14-C15-C16-C18                       | 157.7(3)    | 162.3(3)    | 160.2(3)    | 162,6  | 162,6  |
| C17-C16-C18-O3                        | 178.6(3)    | 175.5(3)    | 178.7(4)    | 176,7  | 176,8  |
| C15-C16-C18-O3                        | 0.4(5)      | 2.6(5)      | -0.5(7)     | 1,5    | 1,4    |
| C18-C16-C17-C13                       | 180.0(3)    | 174.2(3)    | 176.6(3)    | 174,2  | 174,2  |
| C15-C16-C17-C13                       | -1.6(3)     | -4.1(4)     | -4.1(4)     | -4,2   | -4,2   |
| C18-C16-C17-C1                        | 5.8(3)      | 1.0(5)      | 3.9(5)      | 0,2    | 0,3    |
| C15-C16-C17-C1                        | -175.8(2)   | -177.3(2)   | -176.7(2)   | -178,1 | -178,1 |
| C12-C13-C17-C16                       | 138.1(3)    | 141.1(3)    | 140.9(3)    | 141,5  | 141,5  |
| C19-C13-C17-C16                       | -95.7(3)    | -92.2(3)    | -93.3(3)    | -92,9  | -92,9  |
| C14-C13-C17-C16                       | 22.8(3)     | 25.6(3)     | 25.1(3)     | 25,2   | 25,2   |
| C12-C13-C17-C1                        | -47.4(3)    | -45.2(3)    | -46(4)(3)   | -44,1  | -44,2  |
| C19-C13-C17-C1                        | 78.8(3)     | 81.5(3)     | 79.8(3)     | 81,4   | 81,4   |
| C14-C13-C17-C1                        | -162.69(19) | -160.8(2)   | -161.8(2)   | -160,5 | -160,6 |
| C3-O1-C21-O2                          | -0.7(3)     | -3.6(4)     | 1.9(5)      | 0,0    | 0,0    |
| C3-O1-C21-C22                         | 178.8(3)    | 175.5(2)    | 179.4(3)    | 179,9  | 179,7  |
| $MD = \sum  x_{exp} - x^a_{theor} /N$ | <b>4.01</b> | <b>1.66</b> | <b>4.05</b> |        |        |
| $MD = \sum  x_{exp} - x^b_{theor} /N$ | <b>3.93</b> | <b>1.59</b> | <b>3.96</b> |        |        |

\* The structure parameters are in accordance with the atom numbering scheme given in Figure

In  $MD$  (mean deviation) expression:  $x$  = torsion angles and  $N=67$ .

<sup>a</sup>M06-2X/6-31++G(d,p)

<sup>b</sup>M06-2X/6-311++G(d,p)

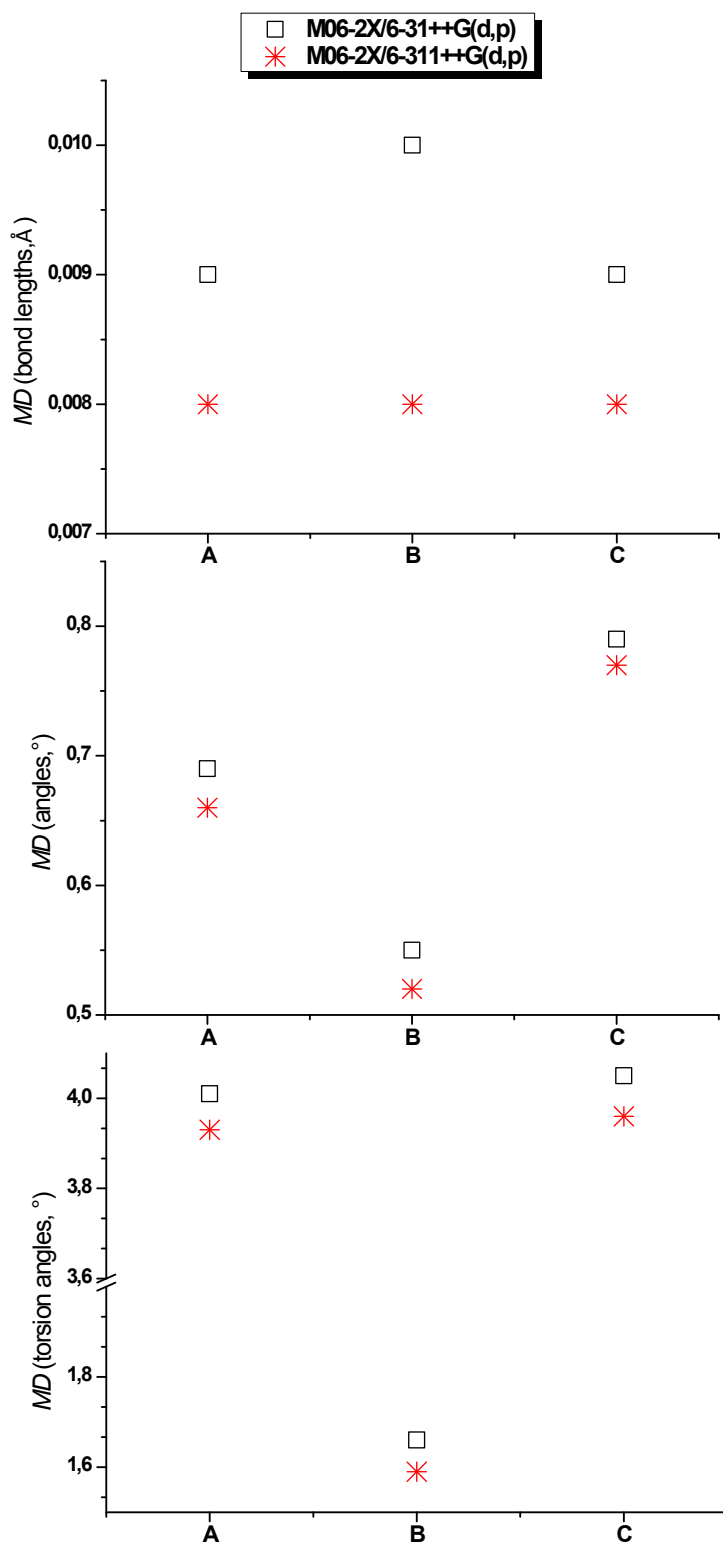

**Figure S1.** Mean deviations (*MD*) values of bond lengths, bond angles and torsion angles



**Table S5.** Relationship of C17-C16-C18-H torsion angle with C18-H distance ( $d_{\text{C18-H}}$ ) and stretching vibrational frequencies of C18-H ( $\nu_{\text{C18-H}}$ ).

| Torsion angle<br>C17-C16-C18-H (°) | $d_{\text{C18-H}}$ (Å) | $\nu_{\text{C-H}}$ (cm <sup>-1</sup> ) |
|------------------------------------|------------------------|----------------------------------------|
| 0                                  | 1.1058                 | 2790.37                                |
| 90                                 | 1.1092                 | 2731.15                                |
| 180                                | 1.1102                 | 2727.56                                |

\*Scale factor = 0.94 for M06-2X/6-31+G(d,p) level of theory taken from: M. Alecu, J. Zheng, Y. Zhao and D. G. Truhlar. Computational Thermochemistry: Scale Factor Databases and Scale Factors for Vibrational Frequencies Obtained from Electronic Model Chemistries. *J. Chem. Theory Comput.*, **2010**, 6., 2872-2887.

**Table S6.** Relative contributions to the Hirshfeld surface area for the intermolecular contacts of the three molecules in title compound **I**.

| Interactions | % Hirshfeld surface area |             |             |
|--------------|--------------------------|-------------|-------------|
|              | Molecule IA              | Molecule IB | Molecule IC |
| H··H         | 64.1                     | 66.1        | 66.3        |
| H··Cl        | 9.2                      | 8.5         | 8.6         |
| H··O         | 19.8                     | 17.9        | 19.5        |
| H··C         | 3.6                      | 3.8         | 3.4         |

## Cif CCDC 925060

#####

#

# Cambridge Crystallographic Data Centre

# CCDC

#

#####

#

# If this CIF has been generated directly or indirectly from an entry in the  
# Cambridge Structural Database, then it will include bibliographic, chemical,  
# crystal, experimental, refinement or atomic coordinate data resulting from  
# the CCDC's data processing and validation procedures. Files generated from  
# CSD entries are Copyright 2013 Cambridge Crystallographic Data Centre. They  
# may be used in bona fide research applications only, and may not be copied or  
# further disseminated in any form, whether machine-readable or not, except for  
# the purposes of generating routine backup copies on your local computer  
# system.

#

# Files arising from any other source may also contain material that is the  
# copyright of third parties, including the originator, and you should check  
# with the originator concerning the permitted uses of the information  
# contained in this CIF.

#

# For further information on the CCDC and the free tools enCIFer and Mercury  
# for validating and visualising CIF files, please visit [www.ccdc.cam.ac.uk](http://www.ccdc.cam.ac.uk)

#

#####

data\_shelxl

\_symmetry\_cell\_setting orthorhombic

\_symmetry\_space\_group\_name\_H-M 'P 21 21 21'

\_symmetry\_Int\_Tables\_number 19

loop\_

\_symmetry\_equiv\_pos\_site\_id

\_symmetry\_equiv\_pos\_as\_xyz

1 x,y,z

2 1/2-x,-y,1/2+z

3 1/2+x,1/2-y,-z

4 -x,1/2+y,1/2-z

\_cell\_length\_a 7.48200(10)

\_cell\_length\_b 22.7510(3)

\_cell\_length\_c 36.2940(5)

\_cell\_angle\_alpha 90

\_cell\_angle\_beta 90

\_cell\_angle\_gamma 90

\_cell\_volume 6178.07

loop\_

\_atom\_site\_label

\_atom\_site\_type\_symbol

\_atom\_site\_fract\_x

\_atom\_site\_fract\_y  
\_atom\_site\_fract\_z  
Cl1A Cl 0.28033(14) 0.09649(5) -0.00117(2)  
O1A O 0.7480(3) 0.18595(10) 0.29069(5)  
O2A O 1.0168(5) 0.22795(13) 0.28532(8)  
O3A O 0.8428(4) 0.06359(12) -0.03192(7)  
C1A C 0.4862(4) 0.17944(13) 0.20259(7)  
H1A H 0.5243 0.2154 0.1906  
H1B H 0.3581 0.1759 0.1992  
C2A C 0.5258(5) 0.18418(15) 0.24375(8)  
H2A H 0.4708 0.2195 0.2535  
H2B H 0.4744 0.1507 0.2565  
C3A C 0.7254(5) 0.18610(13) 0.25074(7)  
H3A H 0.774 0.2228 0.2407  
C4A C 0.8210(4) 0.13460(13) 0.23322(7)  
H4A H 0.7826 0.0984 0.2449  
H4B H 0.9488 0.1386 0.2369  
C5A C 0.7806(4) 0.13200(12) 0.19208(7)  
H5A H 0.817 0.1703 0.1823  
C6A C 0.8931(4) 0.08777(14) 0.17194(7)  
H6A H 0.862 0.0486 0.1803  
H6B H 1.018 0.0945 0.1777  
C7A C 0.8670(4) 0.09146(14) 0.13049(7)  
H7A H 0.9343 0.0603 0.1187  
H7B H 0.9131 0.1287 0.1216  
C8A C 0.6707(3) 0.08603(11) 0.12003(6)  
H8A H 0.6296 0.0465 0.1266  
C9A C 0.5544(3) 0.13145(11) 0.14110(6)  
H9A H 0.6008 0.1702 0.1341  
C10A C 0.5783(3) 0.12701(11) 0.18351(7)  
C11A C 0.3574(4) 0.13056(14) 0.12847(7)  
H11A H 0.3013 0.0953 0.1381  
H11B H 0.2966 0.1641 0.1393  
C12A C 0.3292(4) 0.13217(13) 0.08658(7)  
H12A H 0.2039 0.1258 0.081  
H12B H 0.3632 0.1704 0.0771  
C13A C 0.4417(4) 0.08463(11) 0.06822(7)  
C14A C 0.6391(3) 0.09542(11) 0.07921(6)  
H14A H 0.6588 0.1375 0.0752  
C15A C 0.7485(4) 0.06461(12) 0.04913(7)  
H15A H 0.8651 0.0826 0.0461  
H15B H 0.7633 0.0231 0.0543  
C16A C 0.6311(4) 0.07462(12) 0.01591(7)  
C17A C 0.6916(6) 0.07324(15) -0.02232(9)  
C18A C 0.4630(4) 0.08652(12) 0.02695(7)  
C19A C 0.3722(5) 0.02270(13) 0.07761(8)  
H19A H 0.254 0.0179 0.0678  
H19B H 0.3692 0.0178 0.1039  
H19C H 0.4502 -0.0062 0.067  
C20A C 0.4992(4) 0.06921(12) 0.19815(7)

H20A H 0.5386 0.063 0.223  
H20B H 0.5384 0.0372 0.183  
H20C H 0.3711 0.0714 0.1976  
C21A C 0.8991(6) 0.20840(15) 0.30416(10)  
C22A C 0.8998(6) 0.2061(2) 0.34550(9)  
H22A H 1.0202 0.2101 0.3543  
H22B H 0.8516 0.1692 0.3536  
H22C H 0.8281 0.2376 0.3551  
H17A H 0.592(5) 0.0809(16) -0.0411(10)  
C11B Cl -0.24921(13) 0.41361(5) 0.33984(2)  
O1B O 0.0781(3) 0.27506(8) 0.04792(5)  
O2B O -0.0719(3) 0.19067(10) 0.04215(6)  
O3B O 0.3295(4) 0.43411(11) 0.36219(6)  
C1B C -0.1580(4) 0.30191(14) 0.13850(7)  
H1D H -0.1474 0.2638 0.1502  
H1E H -0.2773 0.3166 0.1434  
C2B C -0.1356(4) 0.29427(14) 0.09697(7)  
H2D H -0.2217 0.2658 0.088  
H2E H -0.1588 0.3314 0.0847  
C3B C 0.0510(4) 0.27373(13) 0.08783(7)  
H3B H 0.0667 0.2334 0.0967  
C4B C 0.1937(4) 0.31216(14) 0.10441(7)  
H4D H 0.1914 0.3504 0.0926  
H4E H 0.3101 0.2947 0.0999  
C5B C 0.1656(3) 0.31960(12) 0.14609(7)  
H5B H 0.1724 0.2802 0.1568  
C6B C 0.3148(4) 0.35522(18) 0.16361(8)  
H6D H 0.3144 0.3946 0.1534  
H6E H 0.4289 0.3372 0.1578  
C7B C 0.2936(4) 0.35888(17) 0.20550(7)  
H7D H 0.3117 0.3202 0.2161  
H7E H 0.3846 0.3848 0.2154  
C8B C 0.1095(3) 0.38163(11) 0.21659(6)  
H8B H 0.097 0.4221 0.2078  
C9B C -0.0377(3) 0.34368(11) 0.19856(6)  
H9B H -0.0128 0.3032 0.2062  
C10B C -0.0212(3) 0.34397(11) 0.15584(7)  
C11B C -0.2264(4) 0.35733(15) 0.21275(7)  
H11D H -0.3064 0.3264 0.2046  
H11E H -0.2666 0.3938 0.2016  
C12B C -0.2421(4) 0.36306(15) 0.25490(7)  
H12D H -0.3601 0.3774 0.2613  
H12E H -0.226 0.3248 0.2663  
C13B C -0.1012(4) 0.40535(12) 0.26908(7)  
C14B C 0.0824(3) 0.38103(11) 0.25781(6)  
H14B H 0.0818 0.3395 0.265  
C15B C 0.2137(4) 0.41153(13) 0.28436(7)  
H15D H 0.3202 0.3881 0.2883  
H15E H 0.2476 0.4502 0.2755  
C16B C 0.1010(4) 0.41528(12) 0.31871(7)

C17B C 0.1742(5) 0.42563(14) 0.35564(8)  
C18B C -0.0703(4) 0.40946(13) 0.31018(7)  
C19B C -0.1355(5) 0.46884(14) 0.25565(9)  
H19D H -0.2403 0.4842 0.2675  
H19E H -0.1531 0.4688 0.2295  
H19F H -0.0345 0.493 0.2617  
C20B C -0.0505(5) 0.40611(13) 0.14045(8)  
H20D H -0.0276 0.4062 0.1144  
H20E H 0.0295 0.433 0.1524  
H20F H -0.1717 0.418 0.1449  
C21B C 0.0053(4) 0.23126(13) 0.02822(7)  
C22B C 0.0293(5) 0.23977(16) -0.01228(7)  
H22D H 0.0879 0.206 -0.0225  
H22E H 0.1008 0.2741 -0.0166  
H22F H -0.0855 0.2446 -0.0237  
H17B H 0.077(5) 0.4252(13) 0.3766(8)  
Cl1C Cl 0.80766(17) 0.57352(5) 0.16918(3)  
O1C O 0.2564(3) 0.70761(9) -0.10970(5)  
O2C O -0.0250(4) 0.73912(13) -0.10137(8)  
O3C O 0.2630(5) 0.51789(13) 0.20057(7)  
C1C C 0.5352(5) 0.69383(13) -0.02418(8)  
H1G H 0.4942 0.7266 -0.0093  
H1H H 0.6644 0.6923 -0.0223  
C2C C 0.4842(5) 0.70514(16) -0.06446(9)  
H2G H 0.5299 0.7432 -0.072  
H2H H 0.5394 0.6755 -0.0799  
C3C C 0.2850(5) 0.70376(13) -0.07001(8)  
H3C H 0.2317 0.7382 -0.0581  
C4C C 0.1997(4) 0.64895(13) -0.05464(7)  
H4G H 0.2379 0.6151 -0.0689  
H4H H 0.0707 0.652 -0.0566  
C5C C 0.2522(4) 0.64049(12) -0.01422(7)  
H5C H 0.2136 0.6763 -0.0015  
C6C C 0.1517(4) 0.59073(14) 0.00371(8)  
H6G H 0.1865 0.5539 -0.0077  
H6H H 0.0246 0.5961 -0.0003  
C7C C 0.1884(4) 0.58748(15) 0.04471(8)  
H7G H 0.1272 0.5537 0.055  
H7H H 0.1421 0.6225 0.0566  
C8C C 0.3873(4) 0.58237(12) 0.05222(7)  
H8C H 0.4295 0.545 0.042  
C9C C 0.4930(3) 0.63281(11) 0.03368(7)  
H9C H 0.4462 0.6693 0.0443  
C10C C 0.4569(4) 0.63668(11) -0.00842(7)  
C11C C 0.6933(4) 0.63104(13) 0.04388(7)  
H11G H 0.7483 0.5983 0.0311  
H11H H 0.7493 0.6668 0.0349  
C12C C 0.7327(4) 0.62509(12) 0.08509(7)  
H12G H 0.8599 0.6193 0.0888  
H12H H 0.6976 0.6608 0.0978

C13C C 0.6303(4) 0.57317(12) 0.10077(7)  
C14C C 0.4297(4) 0.58333(12) 0.09309(7)  
H14C H 0.4055 0.6237 0.1011  
C15C C 0.3334(5) 0.54378(15) 0.12099(8)  
H15G H 0.2158 0.5589 0.1271  
H15H H 0.3223 0.5038 0.112  
C16C C 0.4590(6) 0.54753(14) 0.15328(8)  
C17C C 0.4108(8) 0.53360(18) 0.19132(10)  
C18C C 0.6209(5) 0.56610(13) 0.14217(8)  
C19C C 0.7036(5) 0.51459(13) 0.08565(9)  
H19G H 0.7102 0.5165 0.0593  
H19H H 0.6255 0.4831 0.0927  
H19I H 0.8207 0.5077 0.0955  
C20C C 0.5389(4) 0.58361(13) -0.02845(8)  
H20G H 0.4983 0.583 -0.0535  
H20H H 0.5028 0.548 -0.0163  
H20I H 0.6669 0.5866 -0.028  
C21C C 0.0952(6) 0.72510(15) -0.12149(10)  
C22C C 0.0869(6) 0.7262(2) -0.16275(9)  
H22G H 0.0247 0.6919 -0.1714  
H22H H 0.206 0.7264 -0.1726  
H22I H 0.0247 0.7608 -0.1707  
H17C H 0.520(8) 0.536(2) 0.2089(14)

#END
